# Supplementary material for: A Role for the Mitochondrial Protein Mrpl44 in Maintaining OXPHOS Capacity
Source: PubMed Central journal article supplement (PMC4519308; doi:10.1371/journal.pone.0134326), 2015-07-29

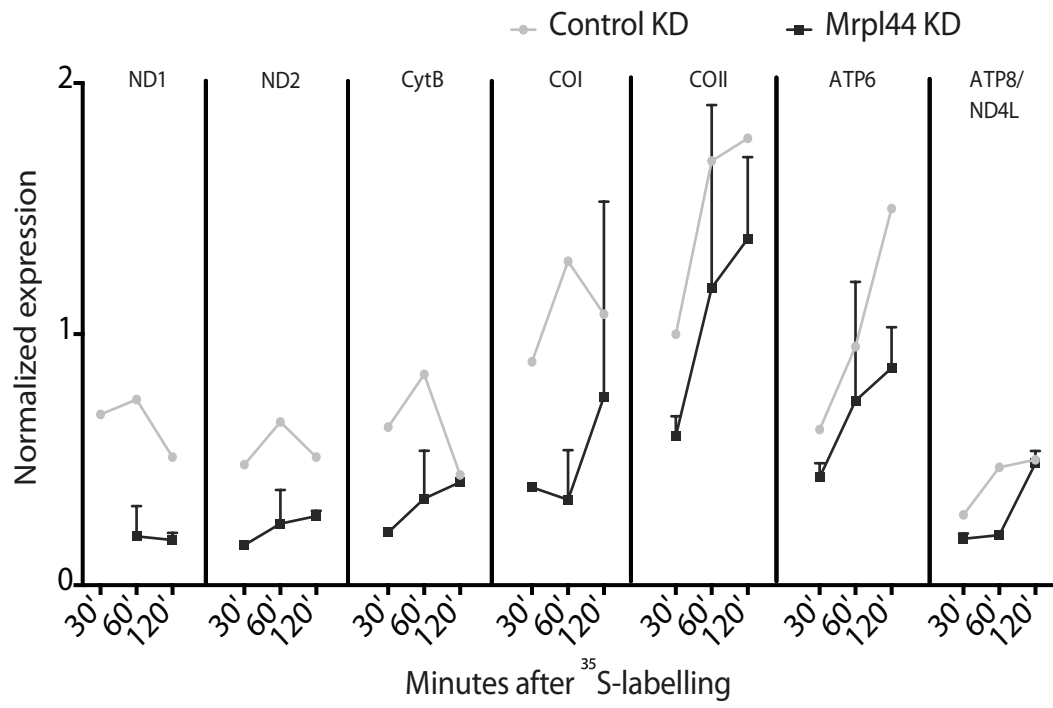

Supplement: pone.0134326.s006.pdf [file pone.0134326.s006.pdf]
