# Supplementary material for: A Role for the Mitochondrial Protein Mrpl44 in Maintaining OXPHOS Capacity
Source: PubMed Central journal article supplement (PMC4519308; doi:10.1371/journal.pone.0134326), 2015-07-29
Supplement: pone.0134326.s008.pdf [file pone.0134326.s008.pdf]

| <b>Antibody</b> | <b>Clone</b> | <b>Concentration used</b> | <b>Company</b>    |
|-----------------|--------------|---------------------------|-------------------|
| Flag            | M2           | 1:1000                    | Sigma             |
| Mrpl44          | 16394-1-AP   | 1:1500                    | Proteintech       |
| Mrpl11          | 15543-1-AP   | 1:600                     | Proteintech       |
| Mrpl12          | 14795-1-AP   | 1:500                     | Proteintech       |
| Mrps15          | 17006-1-AP   | 1:1500                    | Proteintech       |
| MT-ND6          | sc-20510-R   | 1:600                     | Santa Cruz        |
| GFP             | #2956        | 1:1000                    | Cell Signaling    |
| Grp75           | 30A5         | 1:5000                    | Enzo Life Science |
